# Supplementary material for: Compositional shifts in root-associated bacterial and archaeal microbiota track the plant life cycle in field-grown rice
Source: PLoS Biol. 2018 Feb 23;16(2):e2003862. doi: 10.1371/journal.pbio.2003862 (PMC5841827; doi:10.1371/journal.pbio.2003862)
Supplement: S4 Data — (XLSX) [file pbio.2003862.s004.xlsx]

## Sheet: S5 Data
SampleID	Compartment	Site	type	Age	Cultivar	predictions	model	Season
W1.E.2	Endosphere	Arbuckle	Train	7	M206	15.4625	Endosphere	2014
W1.E.4	Endosphere	Arbuckle	Train	7	M206	14.2424	Endosphere	2014
W1.E.5	Endosphere	Arbuckle	Train	7	M206	12.8459	Endosphere	2014
W1.E.7	Endosphere	Arbuckle	Train	7	M206	12.7101	Endosphere	2014
W10.E.1	Endosphere	Arbuckle	Train	70	M206	67.742	Endosphere	2014
W10.E.4	Endosphere	Arbuckle	Train	70	M206	68.8532	Endosphere	2014
W10.E.6	Endosphere	Arbuckle	Train	70	M206	71.3078	Endosphere	2014
W10.E.8	Endosphere	Arbuckle	Train	70	M206	76.307	Endosphere	2014
W11.E.1	Endosphere	Arbuckle	Train	77	M206	76.7317	Endosphere	2014
W11.E.2	Endosphere	Arbuckle	Train	77	M206	83.7543	Endosphere	2014
W11.E.6	Endosphere	Arbuckle	Train	77	M206	78.2278	Endosphere	2014
W11.E.7	Endosphere	Arbuckle	Train	77	M206	78.9628	Endosphere	2014
W12.E.2	Endosphere	Arbuckle	Train	84	M206	83.8572	Endosphere	2014
W12.E.3	Endosphere	Arbuckle	Train	84	M206	90.8614	Endosphere	2014
W12.E.6	Endosphere	Arbuckle	Train	84	M206	88.9562	Endosphere	2014
W12.E.8	Endosphere	Arbuckle	Train	84	M206	87.0282	Endosphere	2014
W13.E.2	Endosphere	Arbuckle	Train	91	M206	92.7845	Endosphere	2014
W13.E.4	Endosphere	Arbuckle	Train	91	M206	91.378	Endosphere	2014
W13.E.5	Endosphere	Arbuckle	Train	91	M206	92.2325	Endosphere	2014
W13.E.8	Endosphere	Arbuckle	Train	91	M206	90.884	Endosphere	2014
W14.E.1	Endosphere	Arbuckle	Train	98	M206	97.6341	Endosphere	2014
W14.E.3	Endosphere	Arbuckle	Train	98	M206	97.8409	Endosphere	2014
W14.E.4	Endosphere	Arbuckle	Train	98	M206	97.8059	Endosphere	2014
W14.E.6	Endosphere	Arbuckle	Train	98	M206	96.0776	Endosphere	2014
W15.E.3	Endosphere	Arbuckle	Train	105	M206	101.195	Endosphere	2014
W15.E.5	Endosphere	Arbuckle	Train	105	M206	99.9479	Endosphere	2014
W15.E.6	Endosphere	Arbuckle	Train	105	M206	103.564	Endosphere	2014
W15.E.7	Endosphere	Arbuckle	Train	105	M206	100.496	Endosphere	2014
W16.E.3	Endosphere	Arbuckle	Train	112	M206	111.032	Endosphere	2014
W16.E.4	Endosphere	Arbuckle	Train	112	M206	103.17	Endosphere	2014
W16.E.7	Endosphere	Arbuckle	Train	112	M206	107.838	Endosphere	2014
W16.E.8	Endosphere	Arbuckle	Train	112	M206	109.943	Endosphere	2014
W17.E.1	Endosphere	Arbuckle	Train	119	M206	96.4124	Endosphere	2014
W17.E.6	Endosphere	Arbuckle	Train	119	M206	113.139	Endosphere	2014
W17.E.7	Endosphere	Arbuckle	Train	119	M206	111.422	Endosphere	2014
W17.E.8	Endosphere	Arbuckle	Train	119	M206	107.056	Endosphere	2014
W18.E.1	Endosphere	Arbuckle	Train	126	M206	122.005	Endosphere	2014
W18.E.2	Endosphere	Arbuckle	Train	126	M206	123.466	Endosphere	2014
W18.E.5	Endosphere	Arbuckle	Train	126	M206	115.961	Endosphere	2014
W18.E.6	Endosphere	Arbuckle	Train	126	M206	121.338	Endosphere	2014
W19.E.2	Endosphere	Arbuckle	Train	133	M206	124.662	Endosphere	2014
W19.E.3	Endosphere	Arbuckle	Train	133	M206	122.382	Endosphere	2014
W19.E.4	Endosphere	Arbuckle	Train	133	M206	127.954	Endosphere	2014
W19.E.8	Endosphere	Arbuckle	Train	133	M206	125.84	Endosphere	2014
W2.E.2	Endosphere	Arbuckle	Train	14	M206	17.0704	Endosphere	2014
W2.E.5	Endosphere	Arbuckle	Train	14	M206	15.9287	Endosphere	2014
W2.E.6	Endosphere	Arbuckle	Train	14	M206	19.4192	Endosphere	2014
W2.E.7	Endosphere	Arbuckle	Train	14	M206	15.022	Endosphere	2014
W3.E.3	Endosphere	Arbuckle	Train	21	M206	21.7597	Endosphere	2014
W3.E.4	Endosphere	Arbuckle	Train	21	M206	22.1548	Endosphere	2014
W3.E.5	Endosphere	Arbuckle	Train	21	M206	23.5398	Endosphere	2014
W3.E.8	Endosphere	Arbuckle	Train	21	M206	26.0314	Endosphere	2014
W4.E.1	Endosphere	Arbuckle	Train	28	M206	31.6043	Endosphere	2014
W4.E.4	Endosphere	Arbuckle	Train	28	M206	30.4799	Endosphere	2014
W4.E.5	Endosphere	Arbuckle	Train	28	M206	32.6135	Endosphere	2014
W4.E.6	Endosphere	Arbuckle	Train	28	M206	31.2284	Endosphere	2014
W5.E.2	Endosphere	Arbuckle	Train	35	M206	36.9663	Endosphere	2014
W5.E.3	Endosphere	Arbuckle	Train	35	M206	36.362	Endosphere	2014
W5.E.4	Endosphere	Arbuckle	Train	35	M206	43.4824	Endosphere	2014
W5.E.6	Endosphere	Arbuckle	Train	35	M206	46.6499	Endosphere	2014
W6.E.1	Endosphere	Arbuckle	Train	42	M206	40.8823	Endosphere	2014
W6.E.2	Endosphere	Arbuckle	Train	42	M206	44.7561	Endosphere	2014
W6.E.4	Endosphere	Arbuckle	Train	42	M206	43.5841	Endosphere	2014
W6.E.8	Endosphere	Arbuckle	Train	42	M206	43.9796	Endosphere	2014
W7.E.1	Endosphere	Arbuckle	Train	49	M206	50.9369	Endosphere	2014
W7.E.3	Endosphere	Arbuckle	Train	49	M206	48.8542	Endosphere	2014
W7.E.5	Endosphere	Arbuckle	Train	49	M206	54.3891	Endosphere	2014
W7.E.6	Endosphere	Arbuckle	Train	49	M206	50.6004	Endosphere	2014
W8.E.1	Endosphere	Arbuckle	Train	56	M206	50.2556	Endosphere	2014
W8.E.3	Endosphere	Arbuckle	Train	56	M206	62.2179	Endosphere	2014
W8.E.4	Endosphere	Arbuckle	Train	56	M206	58.7127	Endosphere	2014
W8.E.5	Endosphere	Arbuckle	Train	56	M206	60.6354	Endosphere	2014
W9.E.2	Endosphere	Arbuckle	Train	63	M206	65.254	Endosphere	2014
W9.E.3	Endosphere	Arbuckle	Train	63	M206	64.5272	Endosphere	2014
W9.E.4	Endosphere	Arbuckle	Train	63	M206	66.8036	Endosphere	2014
W9.E.8	Endosphere	Arbuckle	Train	63	M206	65.7827	Endosphere	2014
W9.E.7	Endosphere	Arbuckle	Test	63	M206	70.6375	Endosphere	2014
W9.E.6	Endosphere	Arbuckle	Test	63	M206	61.3879	Endosphere	2014
W9.E.5	Endosphere	Arbuckle	Test	63	M206	71.0031	Endosphere	2014
W9.E.1	Endosphere	Arbuckle	Test	63	M206	66.3766	Endosphere	2014
W8.E.8	Endosphere	Arbuckle	Test	56	M206	62.5172	Endosphere	2014
W8.E.7	Endosphere	Arbuckle	Test	56	M206	52.3486	Endosphere	2014
W8.E.6	Endosphere	Arbuckle	Test	56	M206	54.4285	Endosphere	2014
W8.E.2	Endosphere	Arbuckle	Test	56	M206	45.2289	Endosphere	2014
W7.E.8	Endosphere	Arbuckle	Test	49	M206	52.164	Endosphere	2014
W7.E.7	Endosphere	Arbuckle	Test	49	M206	51.9122	Endosphere	2014
W7.E.4	Endosphere	Arbuckle	Test	49	M206	48.0613	Endosphere	2014
W7.E.2	Endosphere	Arbuckle	Test	49	M206	50.1898	Endosphere	2014
W6.E.7	Endosphere	Arbuckle	Test	42	M206	47.8161	Endosphere	2014
W6.E.6	Endosphere	Arbuckle	Test	42	M206	44.0447	Endosphere	2014
W6.E.5	Endosphere	Arbuckle	Test	42	M206	55.9923	Endosphere	2014
W6.E.3	Endosphere	Arbuckle	Test	42	M206	40.6751	Endosphere	2014
W5.E.8	Endosphere	Arbuckle	Test	35	M206	45.2618	Endosphere	2014
W5.E.7	Endosphere	Arbuckle	Test	35	M206	34.5844	Endosphere	2014
W5.E.5	Endosphere	Arbuckle	Test	35	M206	52.0735	Endosphere	2014
W5.E.1	Endosphere	Arbuckle	Test	35	M206	39.0145	Endosphere	2014
W4.E.8	Endosphere	Arbuckle	Test	28	M206	28.0856	Endosphere	2014
W4.E.7	Endosphere	Arbuckle	Test	28	M206	30.8863	Endosphere	2014
W4.E.3	Endosphere	Arbuckle	Test	28	M206	30.1635	Endosphere	2014
W4.E.2	Endosphere	Arbuckle	Test	28	M206	35.4734	Endosphere	2014
W3.E.7	Endosphere	Arbuckle	Test	21	M206	22.7668	Endosphere	2014
W3.E.6	Endosphere	Arbuckle	Test	21	M206	32.071	Endosphere	2014
W3.E.2	Endosphere	Arbuckle	Test	21	M206	25.2348	Endosphere	2014
W3.E.1	Endosphere	Arbuckle	Test	21	M206	31.5023	Endosphere	2014
W2.E.8	Endosphere	Arbuckle	Test	14	M206	27.3399	Endosphere	2014
W2.E.4	Endosphere	Arbuckle	Test	14	M206	35.4937	Endosphere	2014
W2.E.3	Endosphere	Arbuckle	Test	14	M206	22.1727	Endosphere	2014
W2.E.1	Endosphere	Arbuckle	Test	14	M206	20.6724	Endosphere	2014
W19.E.7	Endosphere	Arbuckle	Test	133	M206	113.333	Endosphere	2014
W19.E.6	Endosphere	Arbuckle	Test	133	M206	122.606	Endosphere	2014
W19.E.5	Endosphere	Arbuckle	Test	133	M206	107.923	Endosphere	2014
W19.E.1	Endosphere	Arbuckle	Test	133	M206	111.496	Endosphere	2014
W18.E.8	Endosphere	Arbuckle	Test	126	M206	117.966	Endosphere	2014
W18.E.7	Endosphere	Arbuckle	Test	126	M206	112.473	Endosphere	2014
W18.E.4	Endosphere	Arbuckle	Test	126	M206	118.566	Endosphere	2014
W18.E.3	Endosphere	Arbuckle	Test	126	M206	103.911	Endosphere	2014
W17.E.5	Endosphere	Arbuckle	Test	119	M206	107.365	Endosphere	2014
W17.E.4	Endosphere	Arbuckle	Test	119	M206	105.601	Endosphere	2014
W17.E.3	Endosphere	Arbuckle	Test	119	M206	103.517	Endosphere	2014
W17.E.2	Endosphere	Arbuckle	Test	119	M206	104.301	Endosphere	2014
W16.E.6	Endosphere	Arbuckle	Test	112	M206	107.419	Endosphere	2014
W16.E.5	Endosphere	Arbuckle	Test	112	M206	99.2469	Endosphere	2014
W16.E.2	Endosphere	Arbuckle	Test	112	M206	96.7155	Endosphere	2014
W16.E.1	Endosphere	Arbuckle	Test	112	M206	116.522	Endosphere	2014
W15.E.8	Endosphere	Arbuckle	Test	105	M206	91.325	Endosphere	2014
W15.E.4	Endosphere	Arbuckle	Test	105	M206	104.572	Endosphere	2014
W15.E.2	Endosphere	Arbuckle	Test	105	M206	98.9527	Endosphere	2014
W15.E.1	Endosphere	Arbuckle	Test	105	M206	102.186	Endosphere	2014
W14.E.8	Endosphere	Arbuckle	Test	98	M206	87.1796	Endosphere	2014
W14.E.7	Endosphere	Arbuckle	Test	98	M206	96.198	Endosphere	2014
W14.E.5	Endosphere	Arbuckle	Test	98	M206	84.238	Endosphere	2014
W14.E.2	Endosphere	Arbuckle	Test	98	M206	97.7508	Endosphere	2014
W13.E.7	Endosphere	Arbuckle	Test	91	M206	92.8429	Endosphere	2014
W13.E.6	Endosphere	Arbuckle	Test	91	M206	101.171	Endosphere	2014
W13.E.3	Endosphere	Arbuckle	Test	91	M206	96.4213	Endosphere	2014
W13.E.1	Endosphere	Arbuckle	Test	91	M206	72.7526	Endosphere	2014
W12.E.7	Endosphere	Arbuckle	Test	84	M206	107.817	Endosphere	2014
W12.E.5	Endosphere	Arbuckle	Test	84	M206	87.1486	Endosphere	2014
W12.E.4	Endosphere	Arbuckle	Test	84	M206	84.8864	Endosphere	2014
W12.E.1	Endosphere	Arbuckle	Test	84	M206	83.0097	Endosphere	2014
W11.E.8	Endosphere	Arbuckle	Test	77	M206	82.8522	Endosphere	2014
W11.E.5	Endosphere	Arbuckle	Test	77	M206	88.4844	Endosphere	2014
W11.E.4	Endosphere	Arbuckle	Test	77	M206	72.2563	Endosphere	2014
W11.E.3	Endosphere	Arbuckle	Test	77	M206	77.7161	Endosphere	2014
W10.E.7	Endosphere	Arbuckle	Test	70	M206	78.0976	Endosphere	2014
W10.E.5	Endosphere	Arbuckle	Test	70	M206	72.8889	Endosphere	2014
W10.E.3	Endosphere	Arbuckle	Test	70	M206	70.7385	Endosphere	2014
W10.E.2	Endosphere	Arbuckle	Test	70	M206	77.5105	Endosphere	2014
W1.E.8	Endosphere	Arbuckle	Test	7	M206	15.4198	Endosphere	2014
W1.E.6	Endosphere	Arbuckle	Test	7	M206	27.6563	Endosphere	2014
W1.E.3	Endosphere	Arbuckle	Test	7	M206	14.1792	Endosphere	2014
W1.E.1	Endosphere	Arbuckle	Test	7	M206	15.669	Endosphere	2014
ArbF3.99	Endosphere	Arbuckle	Test	4	M206	28.6298	Endosphere	2015
ArbF3.97	Endosphere	Arbuckle	Test	27	M206	36.9789	Endosphere	2015
ArbF3.9	Endosphere	Arbuckle	Test	17	M206	20.8623	Endosphere	2015
ArbF3.87	Endosphere	Arbuckle	Test	12	M206	22.6637	Endosphere	2015
ArbF3.86	Endosphere	Arbuckle	Test	27	M206	36.5262	Endosphere	2015
ArbF3.84	Endosphere	Arbuckle	Test	23	M206	38.4151	Endosphere	2015
ArbF3.83	Endosphere	Arbuckle	Test	2	M206	16.5053	Endosphere	2015
ArbF3.80	Endosphere	Arbuckle	Test	23	M206	35.6599	Endosphere	2015
ArbF3.78	Endosphere	Arbuckle	Test	1	M206	21.4608	Endosphere	2015
ArbF3.77	Endosphere	Arbuckle	Test	19	M206	38.0287	Endosphere	2015
ArbF3.74	Endosphere	Arbuckle	Test	27	M206	37.5613	Endosphere	2015
ArbF3.69	Endosphere	Arbuckle	Test	12	M206	16.3144	Endosphere	2015
ArbF3.68	Endosphere	Arbuckle	Test	12	M206	18.5712	Endosphere	2015
ArbF3.64	Endosphere	Arbuckle	Test	17	M206	29.5421	Endosphere	2015
ArbF3.63	Endosphere	Arbuckle	Test	6	M206	16.0071	Endosphere	2015
ArbF3.61	Endosphere	Arbuckle	Test	25	M206	24.3887	Endosphere	2015
ArbF3.55	Endosphere	Arbuckle	Test	4	M206	16.6826	Endosphere	2015
ArbF3.54	Endosphere	Arbuckle	Test	23	M206	23.0508	Endosphere	2015
ArbF3.43	Endosphere	Arbuckle	Test	25	M206	28.1216	Endosphere	2015
ArbF3.40	Endosphere	Arbuckle	Test	21	M206	22.6359	Endosphere	2015
ArbF3.34	Endosphere	Arbuckle	Test	21	M206	30.3758	Endosphere	2015
ArbF3.32	Endosphere	Arbuckle	Test	6	M206	29.9173	Endosphere	2015
ArbF3.29	Endosphere	Arbuckle	Test	6	M206	13.794	Endosphere	2015
ArbF3.24	Endosphere	Arbuckle	Test	12	M206	23.6187	Endosphere	2015
ArbF3.23	Endosphere	Arbuckle	Test	2	M206	16.8618	Endosphere	2015
ArbF3.21	Endosphere	Arbuckle	Test	23	M206	27.146	Endosphere	2015
ArbF3.12	Endosphere	Arbuckle	Test	2	M206	15.7057	Endosphere	2015
ArbF3.114	Endosphere	Arbuckle	Test	1	M206	17.7856	Endosphere	2015
ArbF3.105	Endosphere	Arbuckle	Test	10	M206	25.7024	Endosphere	2015
ArbF3.102	Endosphere	Arbuckle	Test	10	M206	16.8947	Endosphere	2015
ArbF3.1	Endosphere	Arbuckle	Test	17	M206	28.469	Endosphere	2015
ArbF2.96	Endosphere	Arbuckle	Test	14	M206	18.7833	Endosphere	2015
ArbF2.90	Endosphere	Arbuckle	Test	25	M206	36.873	Endosphere	2015
ArbF2.83	Endosphere	Arbuckle	Test	4	M206	17.7644	Endosphere	2015
ArbF2.81	Endosphere	Arbuckle	Test	10	M206	35.9826	Endosphere	2015
ArbF2.69	Endosphere	Arbuckle	Test	6	M206	25.165	Endosphere	2015
ArbF2.66	Endosphere	Arbuckle	Test	8	M206	21.9352	Endosphere	2015
ArbF2.65	Endosphere	Arbuckle	Test	14	M206	19.3562	Endosphere	2015
ArbF2.50	Endosphere	Arbuckle	Test	17	M206	18.9882	Endosphere	2015
ArbF2.49	Endosphere	Arbuckle	Test	14	M206	23.3336	Endosphere	2015
ArbF2.45	Endosphere	Arbuckle	Test	8	M206	17.5726	Endosphere	2015
ArbF2.44	Endosphere	Arbuckle	Test	8	M206	14.8552	Endosphere	2015
ArbF2.41	Endosphere	Arbuckle	Test	4	M206	28.1692	Endosphere	2015
ArbF2.39	Endosphere	Arbuckle	Test	19	M206	19.1128	Endosphere	2015
ArbF2.36	Endosphere	Arbuckle	Test	21	M206	20.9624	Endosphere	2015
ArbF2.32	Endosphere	Arbuckle	Test	2	M206	16.1756	Endosphere	2015
ArbF2.3	Endosphere	Arbuckle	Test	1	M206	16.8558	Endosphere	2015
ArbF2.26	Endosphere	Arbuckle	Test	19	M206	29.8697	Endosphere	2015
ArbF2.23	Endosphere	Arbuckle	Test	1	M206	28.9746	Endosphere	2015
ArbF2.20	Endosphere	Arbuckle	Test	14	M206	18.6734	Endosphere	2015
ArbF2.18	Endosphere	Arbuckle	Test	19	M206	24.787	Endosphere	2015
ArbF2.17	Endosphere	Arbuckle	Test	27	M206	23.9682	Endosphere	2015
ArbF2.16	Endosphere	Arbuckle	Test	8	M206	16.618	Endosphere	2015
ArbF2.14	Endosphere	Arbuckle	Test	10	M206	15.2313	Endosphere	2015
ArbF2.11	Endosphere	Arbuckle	Test	21	M206	25.2978	Endosphere	2015
ArbF2.10	Endosphere	Arbuckle	Test	25	M206	23.8042	Endosphere	2015
Arb2015.9	Endosphere	Arbuckle	Test	84	M206	96.9043	Endosphere	2015
Arb2015.7	Endosphere	Arbuckle	Test	112	M206	102.294	Endosphere	2015
Arb2015.6	Endosphere	Arbuckle	Test	42	M206	53.3419	Endosphere	2015
Arb2015.56	Endosphere	Arbuckle	Test	56	M206	68.8289	Endosphere	2015
Arb2015.55	Endosphere	Arbuckle	Test	126	M206	84.5728	Endosphere	2015
Arb2015.54	Endosphere	Arbuckle	Test	84	M206	51.6845	Endosphere	2015
Arb2015.53	Endosphere	Arbuckle	Test	70	M206	67.8319	Endosphere	2015
Arb2015.52	Endosphere	Arbuckle	Test	112	M206	87.1985	Endosphere	2015
Arb2015.51	Endosphere	Arbuckle	Test	126	M206	61.94	Endosphere	2015
Arb2015.5	Endosphere	Arbuckle	Test	84	M206	35.8125	Endosphere	2015
Arb2015.49	Endosphere	Arbuckle	Test	70	M206	92.6238	Endosphere	2015
Arb2015.47	Endosphere	Arbuckle	Test	42	M206	33.2801	Endosphere	2015
Arb2015.46	Endosphere	Arbuckle	Test	56	M206	61.7251	Endosphere	2015
Arb2015.44	Endosphere	Arbuckle	Test	126	M206	99.6977	Endosphere	2015
Arb2015.43	Endosphere	Arbuckle	Test	98	M206	104.61	Endosphere	2015
Arb2015.42	Endosphere	Arbuckle	Test	126	M206	110.184	Endosphere	2015
Arb2015.41	Endosphere	Arbuckle	Test	56	M206	64.6037	Endosphere	2015
Arb2015.4	Endosphere	Arbuckle	Test	98	M206	100.045	Endosphere	2015
Arb2015.34	Endosphere	Arbuckle	Test	42	M206	44.9696	Endosphere	2015
Arb2015.32	Endosphere	Arbuckle	Test	56	M206	54.302	Endosphere	2015
Arb2015.31	Endosphere	Arbuckle	Test	84	M206	80.9319	Endosphere	2015
Arb2015.23	Endosphere	Arbuckle	Test	112	M206	107.511	Endosphere	2015
Arb2015.22	Endosphere	Arbuckle	Test	98	M206	106.578	Endosphere	2015
Arb2015.21	Endosphere	Arbuckle	Test	112	M206	102.372	Endosphere	2015
Arb2015.2	Endosphere	Arbuckle	Test	98	M206	101.372	Endosphere	2015
Arb2015.19	Endosphere	Arbuckle	Test	70	M206	70.8447	Endosphere	2015
Arb2015.18	Endosphere	Arbuckle	Test	42	M206	58.0039	Endosphere	2015
Arb2015.16	Endosphere	Arbuckle	Test	70	M206	70.4772	Endosphere	2015
W1.RP.1	Rhizosphere	Arbuckle	Train	7	M206	9.41243	Rhizosphere	2014
W1.RP.3	Rhizosphere	Arbuckle	Train	7	M206	12.4299	Rhizosphere	2014
W1.RP.4	Rhizosphere	Arbuckle	Train	7	M206	9.40053	Rhizosphere	2014
W1.RP.7	Rhizosphere	Arbuckle	Train	7	M206	10.9086	Rhizosphere	2014
W10.RS.1	Rhizosphere	Arbuckle	Train	70	M206	67.7735	Rhizosphere	2014
W10.RS.2	Rhizosphere	Arbuckle	Train	70	M206	70.3323	Rhizosphere	2014
W10.RS.4	Rhizosphere	Arbuckle	Train	70	M206	70.6592	Rhizosphere	2014
W10.RS.8	Rhizosphere	Arbuckle	Train	70	M206	71.3811	Rhizosphere	2014
W11.RS.2	Rhizosphere	Arbuckle	Train	77	M206	79.4029	Rhizosphere	2014
W11.RS.3	Rhizosphere	Arbuckle	Train	77	M206	80.7686	Rhizosphere	2014
W11.RS.5	Rhizosphere	Arbuckle	Train	77	M206	79.9892	Rhizosphere	2014
W11.RS.8	Rhizosphere	Arbuckle	Train	77	M206	76.7212	Rhizosphere	2014
W12.RP.3	Rhizosphere	Arbuckle	Train	84	M206	83.2547	Rhizosphere	2014
W12.RP.4	Rhizosphere	Arbuckle	Train	84	M206	83.3593	Rhizosphere	2014
W12.RP.7	Rhizosphere	Arbuckle	Train	84	M206	85.7068	Rhizosphere	2014
W12.RP.8	Rhizosphere	Arbuckle	Train	84	M206	86.4122	Rhizosphere	2014
W13.RS.1	Rhizosphere	Arbuckle	Train	91	M206	90.9522	Rhizosphere	2014
W13.RS.2	Rhizosphere	Arbuckle	Train	91	M206	90.6024	Rhizosphere	2014
W13.RS.3	Rhizosphere	Arbuckle	Train	91	M206	90.9519	Rhizosphere	2014
W13.RS.7	Rhizosphere	Arbuckle	Train	91	M206	94.8127	Rhizosphere	2014
W14.RS.1	Rhizosphere	Arbuckle	Train	98	M206	97.2125	Rhizosphere	2014
W14.RS.3	Rhizosphere	Arbuckle	Train	98	M206	96.4007	Rhizosphere	2014
W14.RS.4	Rhizosphere	Arbuckle	Train	98	M206	95.7682	Rhizosphere	2014
W14.RS.6	Rhizosphere	Arbuckle	Train	98	M206	94.3656	Rhizosphere	2014
W15.RS.2	Rhizosphere	Arbuckle	Train	105	M206	102.374	Rhizosphere	2014
W15.RS.3	Rhizosphere	Arbuckle	Train	105	M206	103.829	Rhizosphere	2014
W15.RS.6	Rhizosphere	Arbuckle	Train	105	M206	103.29	Rhizosphere	2014
W15.RS.7	Rhizosphere	Arbuckle	Train	105	M206	103.586	Rhizosphere	2014
W16.RS.1	Rhizosphere	Arbuckle	Train	112	M206	106.564	Rhizosphere	2014
W16.RS.4	Rhizosphere	Arbuckle	Train	112	M206	106.628	Rhizosphere	2014
W16.RS.5	Rhizosphere	Arbuckle	Train	112	M206	109.295	Rhizosphere	2014
W16.RS.8	Rhizosphere	Arbuckle	Train	112	M206	109.815	Rhizosphere	2014
W17.RS.1	Rhizosphere	Arbuckle	Train	119	M206	115.135	Rhizosphere	2014
W17.RS.3	Rhizosphere	Arbuckle	Train	119	M206	119.014	Rhizosphere	2014
W17.RS.4	Rhizosphere	Arbuckle	Train	119	M206	115.103	Rhizosphere	2014
W17.RS.6	Rhizosphere	Arbuckle	Train	119	M206	114.479	Rhizosphere	2014
W18.RS.4	Rhizosphere	Arbuckle	Train	126	M206	122.35	Rhizosphere	2014
W18.RS.5	Rhizosphere	Arbuckle	Train	126	M206	108.206	Rhizosphere	2014
W18.RS.6	Rhizosphere	Arbuckle	Train	126	M206	118.189	Rhizosphere	2014
W18.RS.7	Rhizosphere	Arbuckle	Train	126	M206	123.655	Rhizosphere	2014
W19.RS.1	Rhizosphere	Arbuckle	Train	133	M206	124.366	Rhizosphere	2014
W19.RS.5	Rhizosphere	Arbuckle	Train	133	M206	125.125	Rhizosphere	2014
W19.RS.6	Rhizosphere	Arbuckle	Train	133	M206	120.794	Rhizosphere	2014
W19.RS.7	Rhizosphere	Arbuckle	Train	133	M206	122.038	Rhizosphere	2014
W2.RS.1	Rhizosphere	Arbuckle	Train	14	M206	14.5012	Rhizosphere	2014
W2.RS.3	Rhizosphere	Arbuckle	Train	14	M206	17.9779	Rhizosphere	2014
W2.RS.7	Rhizosphere	Arbuckle	Train	14	M206	16.4682	Rhizosphere	2014
W2.RS.8	Rhizosphere	Arbuckle	Train	14	M206	21.3792	Rhizosphere	2014
W3.RS.1	Rhizosphere	Arbuckle	Train	21	M206	22.9775	Rhizosphere	2014
W3.RS.4	Rhizosphere	Arbuckle	Train	21	M206	28.9385	Rhizosphere	2014
W3.RS.6	Rhizosphere	Arbuckle	Train	21	M206	24.0534	Rhizosphere	2014
W3.RS.7	Rhizosphere	Arbuckle	Train	21	M206	26.4336	Rhizosphere	2014
W4.RS.1	Rhizosphere	Arbuckle	Train	28	M206	30.0225	Rhizosphere	2014
W4.RS.3	Rhizosphere	Arbuckle	Train	28	M206	29.473	Rhizosphere	2014
W4.RS.5	Rhizosphere	Arbuckle	Train	28	M206	32.7292	Rhizosphere	2014
W4.RS.8	Rhizosphere	Arbuckle	Train	28	M206	28.9315	Rhizosphere	2014
W5.RP.1	Rhizosphere	Arbuckle	Train	35	M206	38.0184	Rhizosphere	2014
W5.RP.5	Rhizosphere	Arbuckle	Train	35	M206	39.3953	Rhizosphere	2014
W5.RP.6	Rhizosphere	Arbuckle	Train	35	M206	39.2413	Rhizosphere	2014
W5.RP.7	Rhizosphere	Arbuckle	Train	35	M206	36.8944	Rhizosphere	2014
W6.RS.3	Rhizosphere	Arbuckle	Train	42	M206	44.1124	Rhizosphere	2014
W6.RS.4	Rhizosphere	Arbuckle	Train	42	M206	45.0471	Rhizosphere	2014
W6.RS.5	Rhizosphere	Arbuckle	Train	42	M206	48.2263	Rhizosphere	2014
W6.RS.8	Rhizosphere	Arbuckle	Train	42	M206	41.1691	Rhizosphere	2014
W7.RS.2	Rhizosphere	Arbuckle	Train	49	M206	49.7084	Rhizosphere	2014
W7.RS.3	Rhizosphere	Arbuckle	Train	49	M206	47.6063	Rhizosphere	2014
W7.RS.5	Rhizosphere	Arbuckle	Train	49	M206	49.7	Rhizosphere	2014
W7.RS.7	Rhizosphere	Arbuckle	Train	49	M206	52.826	Rhizosphere	2014
W8.RS.1	Rhizosphere	Arbuckle	Train	56	M206	59.4755	Rhizosphere	2014
W8.RS.2	Rhizosphere	Arbuckle	Train	56	M206	59.9685	Rhizosphere	2014
W8.RS.4	Rhizosphere	Arbuckle	Train	56	M206	60.6795	Rhizosphere	2014
W8.RS.7	Rhizosphere	Arbuckle	Train	56	M206	58.8187	Rhizosphere	2014
W9.RS.1	Rhizosphere	Arbuckle	Train	63	M206	65.6791	Rhizosphere	2014
W9.RS.4	Rhizosphere	Arbuckle	Train	63	M206	68.9493	Rhizosphere	2014
W9.RS.5	Rhizosphere	Arbuckle	Train	63	M206	65.4542	Rhizosphere	2014
W9.RS.7	Rhizosphere	Arbuckle	Train	63	M206	63.7831	Rhizosphere	2014
W9.RS.8	Rhizosphere	Arbuckle	Test	63	M206	68.8949	Rhizosphere	2014
W9.RS.6	Rhizosphere	Arbuckle	Test	63	M206	70.3141	Rhizosphere	2014
W9.RS.3	Rhizosphere	Arbuckle	Test	63	M206	78.7458	Rhizosphere	2014
W9.RS.2	Rhizosphere	Arbuckle	Test	63	M206	56.0156	Rhizosphere	2014
W8.RS.8	Rhizosphere	Arbuckle	Test	56	M206	68.7148	Rhizosphere	2014
W8.RS.6	Rhizosphere	Arbuckle	Test	56	M206	52.5077	Rhizosphere	2014
W8.RS.5	Rhizosphere	Arbuckle	Test	56	M206	64.6704	Rhizosphere	2014
W8.RS.3	Rhizosphere	Arbuckle	Test	56	M206	64.1494	Rhizosphere	2014
W7.RS.8	Rhizosphere	Arbuckle	Test	49	M206	47.275	Rhizosphere	2014
W7.RS.6	Rhizosphere	Arbuckle	Test	49	M206	47.1296	Rhizosphere	2014
W7.RS.4	Rhizosphere	Arbuckle	Test	49	M206	47.5293	Rhizosphere	2014
W7.RS.1	Rhizosphere	Arbuckle	Test	49	M206	52.8817	Rhizosphere	2014
W6.RS.7	Rhizosphere	Arbuckle	Test	42	M206	55.3119	Rhizosphere	2014
W6.RS.6	Rhizosphere	Arbuckle	Test	42	M206	39.7173	Rhizosphere	2014
W6.RS.2	Rhizosphere	Arbuckle	Test	42	M206	42.5563	Rhizosphere	2014
W6.RS.1	Rhizosphere	Arbuckle	Test	42	M206	48.9057	Rhizosphere	2014
W5.RP.8	Rhizosphere	Arbuckle	Test	35	M206	41.5735	Rhizosphere	2014
W5.RP.4	Rhizosphere	Arbuckle	Test	35	M206	36.8144	Rhizosphere	2014
W5.RP.3	Rhizosphere	Arbuckle	Test	35	M206	44.7641	Rhizosphere	2014
W5.RP.2	Rhizosphere	Arbuckle	Test	35	M206	40.2855	Rhizosphere	2014
W4.RS.7	Rhizosphere	Arbuckle	Test	28	M206	32.7745	Rhizosphere	2014
W4.RS.6	Rhizosphere	Arbuckle	Test	28	M206	39.074	Rhizosphere	2014
W4.RS.4	Rhizosphere	Arbuckle	Test	28	M206	29.0997	Rhizosphere	2014
W4.RS.2	Rhizosphere	Arbuckle	Test	28	M206	42.378	Rhizosphere	2014
W3.RS.8	Rhizosphere	Arbuckle	Test	21	M206	34.5191	Rhizosphere	2014
W3.RS.5	Rhizosphere	Arbuckle	Test	21	M206	31.6115	Rhizosphere	2014
W3.RS.3	Rhizosphere	Arbuckle	Test	21	M206	22.8879	Rhizosphere	2014
W3.RS.2	Rhizosphere	Arbuckle	Test	21	M206	34.5996	Rhizosphere	2014
W2.RS.6	Rhizosphere	Arbuckle	Test	14	M206	16.0291	Rhizosphere	2014
W2.RS.5	Rhizosphere	Arbuckle	Test	14	M206	18.8281	Rhizosphere	2014
W2.RS.4	Rhizosphere	Arbuckle	Test	14	M206	27.3492	Rhizosphere	2014
W2.RS.2	Rhizosphere	Arbuckle	Test	14	M206	22.9698	Rhizosphere	2014
W19.RS.8	Rhizosphere	Arbuckle	Test	133	M206	98.1183	Rhizosphere	2014
W19.RS.4	Rhizosphere	Arbuckle	Test	133	M206	96.4635	Rhizosphere	2014
W19.RS.3	Rhizosphere	Arbuckle	Test	133	M206	87.4165	Rhizosphere	2014
W19.RS.2	Rhizosphere	Arbuckle	Test	133	M206	112.313	Rhizosphere	2014
W18.RS.8	Rhizosphere	Arbuckle	Test	126	M206	118.606	Rhizosphere	2014
W18.RS.3	Rhizosphere	Arbuckle	Test	126	M206	114.54	Rhizosphere	2014
W18.RS.2	Rhizosphere	Arbuckle	Test	126	M206	113.132	Rhizosphere	2014
W18.RS.1	Rhizosphere	Arbuckle	Test	126	M206	108.168	Rhizosphere	2014
W17.RS.8	Rhizosphere	Arbuckle	Test	119	M206	111.11	Rhizosphere	2014
W17.RS.7	Rhizosphere	Arbuckle	Test	119	M206	111.303	Rhizosphere	2014
W17.RS.5	Rhizosphere	Arbuckle	Test	119	M206	110.752	Rhizosphere	2014
W17.RS.2	Rhizosphere	Arbuckle	Test	119	M206	106.45	Rhizosphere	2014
W16.RS.7	Rhizosphere	Arbuckle	Test	112	M206	108.116	Rhizosphere	2014
W16.RS.6	Rhizosphere	Arbuckle	Test	112	M206	105.419	Rhizosphere	2014
W16.RS.3	Rhizosphere	Arbuckle	Test	112	M206	107.623	Rhizosphere	2014
W16.RS.2	Rhizosphere	Arbuckle	Test	112	M206	97.1705	Rhizosphere	2014
W15.RS.8	Rhizosphere	Arbuckle	Test	105	M206	94.4683	Rhizosphere	2014
W15.RS.5	Rhizosphere	Arbuckle	Test	105	M206	101.574	Rhizosphere	2014
W15.RS.4	Rhizosphere	Arbuckle	Test	105	M206	94.486	Rhizosphere	2014
W15.RS.1	Rhizosphere	Arbuckle	Test	105	M206	97.3324	Rhizosphere	2014
W14.RS.8	Rhizosphere	Arbuckle	Test	98	M206	90.2431	Rhizosphere	2014
W14.RS.7	Rhizosphere	Arbuckle	Test	98	M206	95.385	Rhizosphere	2014
W14.RS.5	Rhizosphere	Arbuckle	Test	98	M206	88.211	Rhizosphere	2014
W14.RS.2	Rhizosphere	Arbuckle	Test	98	M206	97.0093	Rhizosphere	2014
W13.RS.8	Rhizosphere	Arbuckle	Test	91	M206	93.2671	Rhizosphere	2014
W13.RS.6	Rhizosphere	Arbuckle	Test	91	M206	97.3831	Rhizosphere	2014
W13.RS.5	Rhizosphere	Arbuckle	Test	91	M206	90.8404	Rhizosphere	2014
W13.RS.4	Rhizosphere	Arbuckle	Test	91	M206	91.9863	Rhizosphere	2014
W12.RP.6	Rhizosphere	Arbuckle	Test	84	M206	93.5933	Rhizosphere	2014
W12.RP.5	Rhizosphere	Arbuckle	Test	84	M206	88.8645	Rhizosphere	2014
W12.RP.2	Rhizosphere	Arbuckle	Test	84	M206	89.9148	Rhizosphere	2014
W12.RP.1	Rhizosphere	Arbuckle	Test	84	M206	78.8326	Rhizosphere	2014
W11.RS.7	Rhizosphere	Arbuckle	Test	77	M206	84.0989	Rhizosphere	2014
W11.RS.6	Rhizosphere	Arbuckle	Test	77	M206	79.937	Rhizosphere	2014
W11.RS.4	Rhizosphere	Arbuckle	Test	77	M206	83.4979	Rhizosphere	2014
W11.RS.1	Rhizosphere	Arbuckle	Test	77	M206	81.4728	Rhizosphere	2014
W10.RS.7	Rhizosphere	Arbuckle	Test	70	M206	74.3612	Rhizosphere	2014
W10.RS.6	Rhizosphere	Arbuckle	Test	70	M206	79.7755	Rhizosphere	2014
W10.RS.5	Rhizosphere	Arbuckle	Test	70	M206	67.1477	Rhizosphere	2014
W10.RS.3	Rhizosphere	Arbuckle	Test	70	M206	87.2387	Rhizosphere	2014
W1.RP.8	Rhizosphere	Arbuckle	Test	7	M206	39.697	Rhizosphere	2014
W1.RP.6	Rhizosphere	Arbuckle	Test	7	M206	25.1074	Rhizosphere	2014
W1.RP.5	Rhizosphere	Arbuckle	Test	7	M206	15.2691	Rhizosphere	2014
W1.RP.2	Rhizosphere	Arbuckle	Test	7	M206	11.5752	Rhizosphere	2014
ArbF3.98	Rhizosphere	Arbuckle	Test	21	M206	43.5003	Rhizosphere	2015
ArbF3.96	Rhizosphere	Arbuckle	Test	6	M206	25.8554	Rhizosphere	2015
ArbF3.94	Rhizosphere	Arbuckle	Test	12	M206	36.0143	Rhizosphere	2015
ArbF3.91	Rhizosphere	Arbuckle	Test	19	M206	50.9791	Rhizosphere	2015
ArbF3.90	Rhizosphere	Arbuckle	Test	1	M206	32.1904	Rhizosphere	2015
ArbF3.85	Rhizosphere	Arbuckle	Test	1	M206	16.2029	Rhizosphere	2015
ArbF3.81	Rhizosphere	Arbuckle	Test	10	M206	19.8102	Rhizosphere	2015
ArbF3.8	Rhizosphere	Arbuckle	Test	2	M206	13.4248	Rhizosphere	2015
ArbF3.76	Rhizosphere	Arbuckle	Test	6	M206	25.8505	Rhizosphere	2015
ArbF3.70	Rhizosphere	Arbuckle	Test	10	M206	26.0197	Rhizosphere	2015
ArbF3.7	Rhizosphere	Arbuckle	Test	27	M206	39.6571	Rhizosphere	2015
ArbF3.67	Rhizosphere	Arbuckle	Test	1	M206	21.3792	Rhizosphere	2015
ArbF3.65	Rhizosphere	Arbuckle	Test	17	M206	31.3231	Rhizosphere	2015
ArbF3.58	Rhizosphere	Arbuckle	Test	10	M206	28.6414	Rhizosphere	2015
ArbF3.46	Rhizosphere	Arbuckle	Test	14	M206	25.8592	Rhizosphere	2015
ArbF3.41	Rhizosphere	Arbuckle	Test	23	M206	27.0237	Rhizosphere	2015
ArbF3.4	Rhizosphere	Arbuckle	Test	23	M206	29.9054	Rhizosphere	2015
ArbF3.39	Rhizosphere	Arbuckle	Test	21	M206	35.3369	Rhizosphere	2015
ArbF3.33	Rhizosphere	Arbuckle	Test	8	M206	31.3423	Rhizosphere	2015
ArbF3.19	Rhizosphere	Arbuckle	Test	27	M206	22.9014	Rhizosphere	2015
ArbF3.18	Rhizosphere	Arbuckle	Test	23	M206	26.2383	Rhizosphere	2015
ArbF3.16	Rhizosphere	Arbuckle	Test	25	M206	20.1574	Rhizosphere	2015
ArbF3.13	Rhizosphere	Arbuckle	Test	4	M206	16.8502	Rhizosphere	2015
ArbF3.113	Rhizosphere	Arbuckle	Test	23	M206	36.5164	Rhizosphere	2015
ArbF3.112	Rhizosphere	Arbuckle	Test	17	M206	32.2912	Rhizosphere	2015
ArbF3.106	Rhizosphere	Arbuckle	Test	27	M206	48.4253	Rhizosphere	2015
ArbF3.101	Rhizosphere	Arbuckle	Test	2	M206	22.4758	Rhizosphere	2015
ArbF3.10	Rhizosphere	Arbuckle	Test	17	M206	30.457	Rhizosphere	2015
ArbF2.94	Rhizosphere	Arbuckle	Test	12	M206	19.6761	Rhizosphere	2015
ArbF2.92	Rhizosphere	Arbuckle	Test	17	M206	41.1437	Rhizosphere	2015
ArbF2.87	Rhizosphere	Arbuckle	Test	1	M206	21.4438	Rhizosphere	2015
ArbF2.82	Rhizosphere	Arbuckle	Test	14	M206	17.2296	Rhizosphere	2015
ArbF2.79	Rhizosphere	Arbuckle	Test	14	M206	23.3865	Rhizosphere	2015
ArbF2.77	Rhizosphere	Arbuckle	Test	19	M206	34.5133	Rhizosphere	2015
ArbF2.76	Rhizosphere	Arbuckle	Test	14	M206	30.4936	Rhizosphere	2015
ArbF2.74	Rhizosphere	Arbuckle	Test	21	M206	37.7137	Rhizosphere	2015
ArbF2.72	Rhizosphere	Arbuckle	Test	21	M206	27.5102	Rhizosphere	2015
ArbF2.71	Rhizosphere	Arbuckle	Test	19	M206	33.8445	Rhizosphere	2015
ArbF2.7	Rhizosphere	Arbuckle	Test	4	M206	22.5393	Rhizosphere	2015
ArbF2.68	Rhizosphere	Arbuckle	Test	8	M206	27.2984	Rhizosphere	2015
ArbF2.60	Rhizosphere	Arbuckle	Test	4	M206	15.6613	Rhizosphere	2015
ArbF2.59	Rhizosphere	Arbuckle	Test	6	M206	28.4919	Rhizosphere	2015
ArbF2.57	Rhizosphere	Arbuckle	Test	4	M206	16.5977	Rhizosphere	2015
ArbF2.54	Rhizosphere	Arbuckle	Test	19	M206	41.5079	Rhizosphere	2015
ArbF2.51	Rhizosphere	Arbuckle	Test	25	M206	26.848	Rhizosphere	2015
ArbF2.5	Rhizosphere	Arbuckle	Test	8	M206	26.4264	Rhizosphere	2015
ArbF2.46	Rhizosphere	Arbuckle	Test	25	M206	26.134	Rhizosphere	2015
ArbF2.43	Rhizosphere	Arbuckle	Test	2	M206	16.1191	Rhizosphere	2015
ArbF2.40	Rhizosphere	Arbuckle	Test	27	M206	30.2972	Rhizosphere	2015
ArbF2.38	Rhizosphere	Arbuckle	Test	12	M206	23.8847	Rhizosphere	2015
ArbF2.30	Rhizosphere	Arbuckle	Test	25	M206	29.1926	Rhizosphere	2015
ArbF2.29	Rhizosphere	Arbuckle	Test	2	M206	14.0366	Rhizosphere	2015
ArbF2.27	Rhizosphere	Arbuckle	Test	8	M206	16.3975	Rhizosphere	2015
ArbF2.15	Rhizosphere	Arbuckle	Test	12	M206	32.2912	Rhizosphere	2015
ArbF2.13	Rhizosphere	Arbuckle	Test	6	M206	25.0336	Rhizosphere	2015
ArbF2.12	Rhizosphere	Arbuckle	Test	10	M206	20.8157	Rhizosphere	2015
Arb2015.8	Rhizosphere	Arbuckle	Test	70	M206	82.0057	Rhizosphere	2015
Arb2015.50	Rhizosphere	Arbuckle	Test	84	M206	32.2912	Rhizosphere	2015
Arb2015.48	Rhizosphere	Arbuckle	Test	112	M206	101.543	Rhizosphere	2015
Arb2015.45	Rhizosphere	Arbuckle	Test	112	M206	105.51	Rhizosphere	2015
Arb2015.40	Rhizosphere	Arbuckle	Test	56	M206	53.5068	Rhizosphere	2015
Arb2015.39	Rhizosphere	Arbuckle	Test	42	M206	59.0653	Rhizosphere	2015
Arb2015.38	Rhizosphere	Arbuckle	Test	126	M206	99.2803	Rhizosphere	2015
Arb2015.37	Rhizosphere	Arbuckle	Test	42	M206	48.2895	Rhizosphere	2015
Arb2015.36	Rhizosphere	Arbuckle	Test	126	M206	111.015	Rhizosphere	2015
Arb2015.35	Rhizosphere	Arbuckle	Test	56	M206	62.8402	Rhizosphere	2015
Arb2015.33	Rhizosphere	Arbuckle	Test	98	M206	98.2711	Rhizosphere	2015
Arb2015.30	Rhizosphere	Arbuckle	Test	126	M206	114.256	Rhizosphere	2015
Arb2015.3	Rhizosphere	Arbuckle	Test	42	M206	46.823	Rhizosphere	2015
Arb2015.29	Rhizosphere	Arbuckle	Test	70	M206	82.4875	Rhizosphere	2015
Arb2015.28	Rhizosphere	Arbuckle	Test	112	M206	95.9397	Rhizosphere	2015
Arb2015.27	Rhizosphere	Arbuckle	Test	84	M206	81.0066	Rhizosphere	2015
Arb2015.26	Rhizosphere	Arbuckle	Test	84	M206	94.8806	Rhizosphere	2015
Arb2015.25	Rhizosphere	Arbuckle	Test	84	M206	92.2231	Rhizosphere	2015
Arb2015.24	Rhizosphere	Arbuckle	Test	98	M206	91.4004	Rhizosphere	2015
Arb2015.20	Rhizosphere	Arbuckle	Test	56	M206	51.856	Rhizosphere	2015
Arb2015.17	Rhizosphere	Arbuckle	Test	112	M206	106.234	Rhizosphere	2015
Arb2015.15	Rhizosphere	Arbuckle	Test	70	M206	80.7002	Rhizosphere	2015
Arb2015.14	Rhizosphere	Arbuckle	Test	56	M206	55.6323	Rhizosphere	2015
Arb2015.13	Rhizosphere	Arbuckle	Test	70	M206	77.0994	Rhizosphere	2015
Arb2015.12	Rhizosphere	Arbuckle	Test	98	M206	99.5426	Rhizosphere	2015
Arb2015.11	Rhizosphere	Arbuckle	Test	126	M206	100.118	Rhizosphere	2015
Arb2015.10	Rhizosphere	Arbuckle	Test	42	M206	50.2175	Rhizosphere	2015
Arb2015.1	Rhizosphere	Arbuckle	Test	98	M206	69.7704	Rhizosphere	2015
ARK16.102	Endosphere	Jonesboro	Train	42	CLXL745	41.1549	Endosphere	2016
ARK16.104	Endosphere	Jonesboro	Train	42	Sabine	37.8404	Endosphere	2016
ARK16.105	Endosphere	Jonesboro	Train	42	CLXL745	44.5545	Endosphere	2016
ARK16.106	Endosphere	Jonesboro	Train	42	CLXL745	41.3299	Endosphere	2016
ARK16.107	Endosphere	Jonesboro	Train	42	Sabine	45.2552	Endosphere	2016
ARK16.109	Endosphere	Jonesboro	Train	42	Sabine	45.1484	Endosphere	2016
ARK16.110	Endosphere	Jonesboro	Train	42	Sabine	43.3636	Endosphere	2016
ARK16.112	Endosphere	Jonesboro	Train	42	CLXL745	42.1428	Endosphere	2016
ARK16.138	Endosphere	Jonesboro	Train	70	Sabine	73.9573	Endosphere	2016
ARK16.140	Endosphere	Jonesboro	Train	70	CLXL745	68.2768	Endosphere	2016
ARK16.141	Endosphere	Jonesboro	Train	70	CLXL745	71.4028	Endosphere	2016
ARK16.145	Endosphere	Jonesboro	Train	70	CLXL745	67.5523	Endosphere	2016
ARK16.146	Endosphere	Jonesboro	Train	70	CLXL745	72.4642	Endosphere	2016
ARK16.148	Endosphere	Jonesboro	Train	70	Sabine	73.5222	Endosphere	2016
ARK16.149	Endosphere	Jonesboro	Train	70	Sabine	73.4064	Endosphere	2016
ARK16.151	Endosphere	Jonesboro	Train	70	CLXL745	70.8442	Endosphere	2016
ARK16.178	Endosphere	Jonesboro	Train	84	Sabine	85.4947	Endosphere	2016
ARK16.179	Endosphere	Jonesboro	Train	84	CLXL745	82.359	Endosphere	2016
ARK16.180	Endosphere	Jonesboro	Train	84	CLXL745	80.0067	Endosphere	2016
ARK16.183	Endosphere	Jonesboro	Train	84	Sabine	82.6604	Endosphere	2016
ARK16.184	Endosphere	Jonesboro	Train	84	Sabine	85.1303	Endosphere	2016
ARK16.186	Endosphere	Jonesboro	Train	84	CLXL745	84.9303	Endosphere	2016
ARK16.188	Endosphere	Jonesboro	Train	84	Sabine	88.7096	Endosphere	2016
ARK16.190	Endosphere	Jonesboro	Train	84	Sabine	85.8025	Endosphere	2016
ARK16.20	Endosphere	Jonesboro	Train	28	CLXL745	25.7682	Endosphere	2016
ARK16.21	Endosphere	Jonesboro	Train	28	CLXL745	26.7988	Endosphere	2016
ARK16.225	Endosphere	Jonesboro	Train	14	Sabine	15.4366	Endosphere	2016
ARK16.226	Endosphere	Jonesboro	Train	14	Sabine	15.9171	Endosphere	2016
ARK16.227	Endosphere	Jonesboro	Train	14	CLXL745	15.7358	Endosphere	2016
ARK16.228	Endosphere	Jonesboro	Train	14	CLXL745	15.3218	Endosphere	2016
ARK16.23	Endosphere	Jonesboro	Train	28	Sabine	26.7535	Endosphere	2016
ARK16.231	Endosphere	Jonesboro	Train	14	Sabine	14.8339	Endosphere	2016
ARK16.236	Endosphere	Jonesboro	Train	14	Sabine	15.5832	Endosphere	2016
ARK16.237	Endosphere	Jonesboro	Train	14	Sabine	15.1984	Endosphere	2016
ARK16.240	Endosphere	Jonesboro	Train	14	CLXL745	15.1643	Endosphere	2016
ARK16.26	Endosphere	Jonesboro	Train	28	CLXL745	28.5924	Endosphere	2016
ARK16.265	Endosphere	Jonesboro	Train	112	Sabine	104.865	Endosphere	2016
ARK16.266	Endosphere	Jonesboro	Train	112	Sabine	107.878	Endosphere	2016
ARK16.267	Endosphere	Jonesboro	Train	112	CLXL745	107.161	Endosphere	2016
ARK16.27	Endosphere	Jonesboro	Train	28	Sabine	28.1666	Endosphere	2016
ARK16.272	Endosphere	Jonesboro	Train	112	Sabine	107.81	Endosphere	2016
ARK16.273	Endosphere	Jonesboro	Train	112	CLXL745	109.092	Endosphere	2016
ARK16.274	Endosphere	Jonesboro	Train	112	CLXL745	108.615	Endosphere	2016
ARK16.276	Endosphere	Jonesboro	Train	112	Sabine	102.693	Endosphere	2016
ARK16.279	Endosphere	Jonesboro	Train	112	CLXL745	104.641	Endosphere	2016
ARK16.28	Endosphere	Jonesboro	Train	28	Sabine	33.3905	Endosphere	2016
ARK16.30	Endosphere	Jonesboro	Train	28	Sabine	26.4598	Endosphere	2016
ARK16.305	Endosphere	Jonesboro	Train	98	Sabine	98.1904	Endosphere	2016
ARK16.307	Endosphere	Jonesboro	Train	98	CLXL745	94.7396	Endosphere	2016
ARK16.308	Endosphere	Jonesboro	Train	98	CLXL745	95.2854	Endosphere	2016
ARK16.310	Endosphere	Jonesboro	Train	98	CLXL745	91.3274	Endosphere	2016
ARK16.311	Endosphere	Jonesboro	Train	98	Sabine	96.3524	Endosphere	2016
ARK16.314	Endosphere	Jonesboro	Train	98	CLXL745	98.1764	Endosphere	2016
ARK16.316	Endosphere	Jonesboro	Train	98	Sabine	100.772	Endosphere	2016
ARK16.317	Endosphere	Jonesboro	Train	98	Sabine	96.0181	Endosphere	2016
ARK16.32	Endosphere	Jonesboro	Train	28	CLXL745	26.0587	Endosphere	2016
ARK16.59	Endosphere	Jonesboro	Train	56	CLXL745	63.3045	Endosphere	2016
ARK16.62	Endosphere	Jonesboro	Train	56	CLXL745	56.1608	Endosphere	2016
ARK16.64	Endosphere	Jonesboro	Train	56	Sabine	59.4032	Endosphere	2016
ARK16.65	Endosphere	Jonesboro	Train	56	CLXL745	59.2445	Endosphere	2016
ARK16.66	Endosphere	Jonesboro	Train	56	CLXL745	60.0696	Endosphere	2016
ARK16.67	Endosphere	Jonesboro	Train	56	Sabine	57.7423	Endosphere	2016
ARK16.69	Endosphere	Jonesboro	Train	56	Sabine	55.3905	Endosphere	2016
ARK16.71	Endosphere	Jonesboro	Train	56	CLXL745	49.8594	Endosphere	2016
ARK16.99	Endosphere	Jonesboro	Test	42	CLXL745	40.8947	Endosphere	2016
ARK16.98	Endosphere	Jonesboro	Test	42	Sabine	57.6938	Endosphere	2016
ARK16.97	Endosphere	Jonesboro	Test	42	Sabine	45.5105	Endosphere	2016
ARK16.72	Endosphere	Jonesboro	Test	56	CLXL745	53.4728	Endosphere	2016
ARK16.70	Endosphere	Jonesboro	Test	56	Sabine	56.0945	Endosphere	2016
ARK16.68	Endosphere	Jonesboro	Test	56	Sabine	75.4255	Endosphere	2016
ARK16.63	Endosphere	Jonesboro	Test	56	Sabine	59.7982	Endosphere	2016
ARK16.61	Endosphere	Jonesboro	Test	56	CLXL745	57.4716	Endosphere	2016
ARK16.60	Endosphere	Jonesboro	Test	56	CLXL745	62.7562	Endosphere	2016
ARK16.58	Endosphere	Jonesboro	Test	56	Sabine	73.0513	Endosphere	2016
ARK16.57	Endosphere	Jonesboro	Test	56	Sabine	68.932	Endosphere	2016
ARK16.320	Endosphere	Jonesboro	Test	98	CLXL745	91.143	Endosphere	2016
ARK16.319	Endosphere	Jonesboro	Test	98	CLXL745	84.0485	Endosphere	2016
ARK16.318	Endosphere	Jonesboro	Test	98	Sabine	95.9065	Endosphere	2016
ARK16.315	Endosphere	Jonesboro	Test	98	Sabine	92.0029	Endosphere	2016
ARK16.313	Endosphere	Jonesboro	Test	98	CLXL745	85.9476	Endosphere	2016
ARK16.312	Endosphere	Jonesboro	Test	98	Sabine	82.7384	Endosphere	2016
ARK16.31	Endosphere	Jonesboro	Test	28	CLXL745	24.1283	Endosphere	2016
ARK16.309	Endosphere	Jonesboro	Test	98	CLXL745	79.3315	Endosphere	2016
ARK16.306	Endosphere	Jonesboro	Test	98	Sabine	100.522	Endosphere	2016
ARK16.29	Endosphere	Jonesboro	Test	28	Sabine	22.6933	Endosphere	2016
ARK16.280	Endosphere	Jonesboro	Test	112	CLXL745	83.8397	Endosphere	2016
ARK16.278	Endosphere	Jonesboro	Test	112	Sabine	94.1318	Endosphere	2016
ARK16.277	Endosphere	Jonesboro	Test	112	Sabine	104.1	Endosphere	2016
ARK16.275	Endosphere	Jonesboro	Test	112	Sabine	107.319	Endosphere	2016
ARK16.271	Endosphere	Jonesboro	Test	112	Sabine	101.165	Endosphere	2016
ARK16.270	Endosphere	Jonesboro	Test	112	CLXL745	94.028	Endosphere	2016
ARK16.269	Endosphere	Jonesboro	Test	112	CLXL745	93.3574	Endosphere	2016
ARK16.268	Endosphere	Jonesboro	Test	112	CLXL745	98.7224	Endosphere	2016
ARK16.25	Endosphere	Jonesboro	Test	28	CLXL745	46.5894	Endosphere	2016
ARK16.24	Endosphere	Jonesboro	Test	28	Sabine	32.3008	Endosphere	2016
ARK16.239	Endosphere	Jonesboro	Test	14	CLXL745	18.5544	Endosphere	2016
ARK16.238	Endosphere	Jonesboro	Test	14	Sabine	17.0464	Endosphere	2016
ARK16.235	Endosphere	Jonesboro	Test	14	Sabine	15.3386	Endosphere	2016
ARK16.234	Endosphere	Jonesboro	Test	14	CLXL745	33.7652	Endosphere	2016
ARK16.233	Endosphere	Jonesboro	Test	14	CLXL745	14.4384	Endosphere	2016
ARK16.232	Endosphere	Jonesboro	Test	14	Sabine	18.7964	Endosphere	2016
ARK16.230	Endosphere	Jonesboro	Test	14	CLXL745	19.6198	Endosphere	2016
ARK16.229	Endosphere	Jonesboro	Test	14	CLXL745	19.8497	Endosphere	2016
ARK16.22	Endosphere	Jonesboro	Test	28	CLXL745	26.4161	Endosphere	2016
ARK16.192	Endosphere	Jonesboro	Test	84	CLXL745	72.2472	Endosphere	2016
ARK16.191	Endosphere	Jonesboro	Test	84	CLXL745	81.5796	Endosphere	2016
ARK16.19	Endosphere	Jonesboro	Test	28	CLXL745	26.1023	Endosphere	2016
ARK16.189	Endosphere	Jonesboro	Test	84	Sabine	80.4699	Endosphere	2016
ARK16.187	Endosphere	Jonesboro	Test	84	Sabine	82.6919	Endosphere	2016
ARK16.185	Endosphere	Jonesboro	Test	84	CLXL745	81.3591	Endosphere	2016
ARK16.182	Endosphere	Jonesboro	Test	84	CLXL745	86.4943	Endosphere	2016
ARK16.181	Endosphere	Jonesboro	Test	84	CLXL745	84.7103	Endosphere	2016
ARK16.18	Endosphere	Jonesboro	Test	28	Sabine	26.2971	Endosphere	2016
ARK16.177	Endosphere	Jonesboro	Test	84	Sabine	87.6309	Endosphere	2016
ARK16.17	Endosphere	Jonesboro	Test	28	Sabine	27.7384	Endosphere	2016
ARK16.152	Endosphere	Jonesboro	Test	70	CLXL745	67.6121	Endosphere	2016
ARK16.150	Endosphere	Jonesboro	Test	70	Sabine	62.6864	Endosphere	2016
ARK16.147	Endosphere	Jonesboro	Test	70	Sabine	76.5368	Endosphere	2016
ARK16.144	Endosphere	Jonesboro	Test	70	Sabine	59.9765	Endosphere	2016
ARK16.143	Endosphere	Jonesboro	Test	70	Sabine	75.6079	Endosphere	2016
ARK16.142	Endosphere	Jonesboro	Test	70	CLXL745	62.9729	Endosphere	2016
ARK16.139	Endosphere	Jonesboro	Test	70	CLXL745	64.719	Endosphere	2016
ARK16.137	Endosphere	Jonesboro	Test	70	Sabine	80.7119	Endosphere	2016
ARK16.111	Endosphere	Jonesboro	Test	42	CLXL745	41.268	Endosphere	2016
ARK16.108	Endosphere	Jonesboro	Test	42	Sabine	42.5269	Endosphere	2016
ARK16.103	Endosphere	Jonesboro	Test	42	Sabine	45.353	Endosphere	2016
ARK16.101	Endosphere	Jonesboro	Test	42	CLXL745	38.2193	Endosphere	2016
ARK16.100	Endosphere	Jonesboro	Test	42	CLXL745	41.1486	Endosphere	2016
ARK16.12	Rhizosphere	Jonesboro	Train	28	Sabine	29.8293	Rhizosphere	2016
ARK16.121	Rhizosphere	Jonesboro	Train	70	Sabine	74.7467	Rhizosphere	2016
ARK16.122	Rhizosphere	Jonesboro	Train	70	Sabine	73.2865	Rhizosphere	2016
ARK16.123	Rhizosphere	Jonesboro	Train	70	CLXL745	69.9974	Rhizosphere	2016
ARK16.125	Rhizosphere	Jonesboro	Train	70	CLXL745	68.9561	Rhizosphere	2016
ARK16.13	Rhizosphere	Jonesboro	Train	28	Sabine	27.8276	Rhizosphere	2016
ARK16.130	Rhizosphere	Jonesboro	Train	70	CLXL745	71.0988	Rhizosphere	2016
ARK16.131	Rhizosphere	Jonesboro	Train	70	Sabine	71.1772	Rhizosphere	2016
ARK16.133	Rhizosphere	Jonesboro	Train	70	Sabine	70.3722	Rhizosphere	2016
ARK16.135	Rhizosphere	Jonesboro	Train	70	CLXL745	69.7732	Rhizosphere	2016
ARK16.14	Rhizosphere	Jonesboro	Train	28	Sabine	27.9811	Rhizosphere	2016
ARK16.16	Rhizosphere	Jonesboro	Train	28	CLXL745	26.0755	Rhizosphere	2016
ARK16.161	Rhizosphere	Jonesboro	Train	84	Sabine	85.8865	Rhizosphere	2016
ARK16.165	Rhizosphere	Jonesboro	Train	84	CLXL745	82.3142	Rhizosphere	2016
ARK16.166	Rhizosphere	Jonesboro	Train	84	CLXL745	82.2029	Rhizosphere	2016
ARK16.167	Rhizosphere	Jonesboro	Train	84	Sabine	85.4763	Rhizosphere	2016
ARK16.169	Rhizosphere	Jonesboro	Train	84	CLXL745	84.2578	Rhizosphere	2016
ARK16.173	Rhizosphere	Jonesboro	Train	84	Sabine	85.4446	Rhizosphere	2016
ARK16.175	Rhizosphere	Jonesboro	Train	84	CLXL745	82.2747	Rhizosphere	2016
ARK16.176	Rhizosphere	Jonesboro	Train	84	CLXL745	85.0894	Rhizosphere	2016
ARK16.2	Rhizosphere	Jonesboro	Train	28	Sabine	23.2997	Rhizosphere	2016
ARK16.210	Rhizosphere	Jonesboro	Train	14	Sabine	15.3914	Rhizosphere	2016
ARK16.212	Rhizosphere	Jonesboro	Train	14	CLXL745	22.1786	Rhizosphere	2016
ARK16.216	Rhizosphere	Jonesboro	Train	14	Sabine	15.3001	Rhizosphere	2016
ARK16.217	Rhizosphere	Jonesboro	Train	14	CLXL745	18.641	Rhizosphere	2016
ARK16.218	Rhizosphere	Jonesboro	Train	14	CLXL745	19.7937	Rhizosphere	2016
ARK16.221	Rhizosphere	Jonesboro	Train	14	Sabine	15.5211	Rhizosphere	2016
ARK16.222	Rhizosphere	Jonesboro	Train	14	Sabine	18.8998	Rhizosphere	2016
ARK16.223	Rhizosphere	Jonesboro	Train	14	CLXL745	16.2505	Rhizosphere	2016
ARK16.250	Rhizosphere	Jonesboro	Train	112	Sabine	107.026	Rhizosphere	2016
ARK16.253	Rhizosphere	Jonesboro	Train	112	CLXL745	106.551	Rhizosphere	2016
ARK16.255	Rhizosphere	Jonesboro	Train	112	Sabine	107.474	Rhizosphere	2016
ARK16.257	Rhizosphere	Jonesboro	Train	112	CLXL745	107.063	Rhizosphere	2016
ARK16.259	Rhizosphere	Jonesboro	Train	112	Sabine	102.922	Rhizosphere	2016
ARK16.261	Rhizosphere	Jonesboro	Train	112	Sabine	104.934	Rhizosphere	2016
ARK16.262	Rhizosphere	Jonesboro	Train	112	Sabine	104.1	Rhizosphere	2016
ARK16.264	Rhizosphere	Jonesboro	Train	112	CLXL745	107.597	Rhizosphere	2016
ARK16.289	Rhizosphere	Jonesboro	Train	98	Sabine	96.8214	Rhizosphere	2016
ARK16.290	Rhizosphere	Jonesboro	Train	98	Sabine	95.6751	Rhizosphere	2016
ARK16.294	Rhizosphere	Jonesboro	Train	98	CLXL745	93.4829	Rhizosphere	2016
ARK16.295	Rhizosphere	Jonesboro	Train	98	Sabine	96.7556	Rhizosphere	2016
ARK16.296	Rhizosphere	Jonesboro	Train	98	Sabine	95.5988	Rhizosphere	2016
ARK16.299	Rhizosphere	Jonesboro	Train	98	Sabine	96.5244	Rhizosphere	2016
ARK16.301	Rhizosphere	Jonesboro	Train	98	Sabine	93.3459	Rhizosphere	2016
ARK16.302	Rhizosphere	Jonesboro	Train	98	Sabine	93.2433	Rhizosphere	2016
ARK16.4	Rhizosphere	Jonesboro	Train	28	CLXL745	28.7679	Rhizosphere	2016
ARK16.43	Rhizosphere	Jonesboro	Train	56	CLXL745	57.7656	Rhizosphere	2016
ARK16.44	Rhizosphere	Jonesboro	Train	56	CLXL745	58.5737	Rhizosphere	2016
ARK16.48	Rhizosphere	Jonesboro	Train	56	Sabine	56.5882	Rhizosphere	2016
ARK16.49	Rhizosphere	Jonesboro	Train	56	CLXL745	56.9294	Rhizosphere	2016
ARK16.5	Rhizosphere	Jonesboro	Train	28	CLXL745	27.1112	Rhizosphere	2016
ARK16.51	Rhizosphere	Jonesboro	Train	56	Sabine	58.5797	Rhizosphere	2016
ARK16.52	Rhizosphere	Jonesboro	Train	56	Sabine	61.4824	Rhizosphere	2016
ARK16.54	Rhizosphere	Jonesboro	Train	56	Sabine	57.7213	Rhizosphere	2016
ARK16.56	Rhizosphere	Jonesboro	Train	56	CLXL745	57.225	Rhizosphere	2016
ARK16.7	Rhizosphere	Jonesboro	Train	28	Sabine	28.1423	Rhizosphere	2016
ARK16.81	Rhizosphere	Jonesboro	Train	42	Sabine	40.5515	Rhizosphere	2016
ARK16.82	Rhizosphere	Jonesboro	Train	42	Sabine	43.6284	Rhizosphere	2016
ARK16.85	Rhizosphere	Jonesboro	Train	42	CLXL745	40.2827	Rhizosphere	2016
ARK16.87	Rhizosphere	Jonesboro	Train	42	Sabine	42.7924	Rhizosphere	2016
ARK16.88	Rhizosphere	Jonesboro	Train	42	Sabine	45.7261	Rhizosphere	2016
ARK16.90	Rhizosphere	Jonesboro	Train	42	CLXL745	42.074	Rhizosphere	2016
ARK16.93	Rhizosphere	Jonesboro	Train	42	Sabine	42.1848	Rhizosphere	2016
ARK16.96	Rhizosphere	Jonesboro	Train	42	CLXL745	40.3345	Rhizosphere	2016
ARK16.95	Rhizosphere	Jonesboro	Test	42	CLXL745	36.8947	Rhizosphere	2016
ARK16.94	Rhizosphere	Jonesboro	Test	42	Sabine	42.4711	Rhizosphere	2016
ARK16.92	Rhizosphere	Jonesboro	Test	42	Sabine	34.1462	Rhizosphere	2016
ARK16.91	Rhizosphere	Jonesboro	Test	42	Sabine	39.6541	Rhizosphere	2016
ARK16.9	Rhizosphere	Jonesboro	Test	28	CLXL745	32.7033	Rhizosphere	2016
ARK16.89	Rhizosphere	Jonesboro	Test	42	CLXL745	43.2126	Rhizosphere	2016
ARK16.86	Rhizosphere	Jonesboro	Test	42	CLXL745	47.0624	Rhizosphere	2016
ARK16.84	Rhizosphere	Jonesboro	Test	42	CLXL745	38.3402	Rhizosphere	2016
ARK16.83	Rhizosphere	Jonesboro	Test	42	CLXL745	38.731	Rhizosphere	2016
ARK16.8	Rhizosphere	Jonesboro	Test	28	Sabine	28.9357	Rhizosphere	2016
ARK16.6	Rhizosphere	Jonesboro	Test	28	CLXL745	25.9098	Rhizosphere	2016
ARK16.55	Rhizosphere	Jonesboro	Test	56	CLXL745	57.2621	Rhizosphere	2016
ARK16.53	Rhizosphere	Jonesboro	Test	56	Sabine	54.4941	Rhizosphere	2016
ARK16.50	Rhizosphere	Jonesboro	Test	56	CLXL745	56.8647	Rhizosphere	2016
ARK16.47	Rhizosphere	Jonesboro	Test	56	Sabine	59.8066	Rhizosphere	2016
ARK16.46	Rhizosphere	Jonesboro	Test	56	CLXL745	59.4813	Rhizosphere	2016
ARK16.45	Rhizosphere	Jonesboro	Test	56	CLXL745	59.188	Rhizosphere	2016
ARK16.42	Rhizosphere	Jonesboro	Test	56	Sabine	63.1596	Rhizosphere	2016
ARK16.41	Rhizosphere	Jonesboro	Test	56	Sabine	62.1565	Rhizosphere	2016
ARK16.304	Rhizosphere	Jonesboro	Test	98	CLXL745	79.9078	Rhizosphere	2016
ARK16.303	Rhizosphere	Jonesboro	Test	98	CLXL745	80.2886	Rhizosphere	2016
ARK16.300	Rhizosphere	Jonesboro	Test	98	Sabine	97.1406	Rhizosphere	2016
ARK16.3	Rhizosphere	Jonesboro	Test	28	CLXL745	32.7227	Rhizosphere	2016
ARK16.298	Rhizosphere	Jonesboro	Test	98	CLXL745	98.444	Rhizosphere	2016
ARK16.297	Rhizosphere	Jonesboro	Test	98	CLXL745	92.4677	Rhizosphere	2016
ARK16.293	Rhizosphere	Jonesboro	Test	98	CLXL745	91.4982	Rhizosphere	2016
ARK16.292	Rhizosphere	Jonesboro	Test	98	CLXL745	89.4889	Rhizosphere	2016
ARK16.291	Rhizosphere	Jonesboro	Test	98	CLXL745	89.247	Rhizosphere	2016
ARK16.263	Rhizosphere	Jonesboro	Test	112	CLXL745	97.4204	Rhizosphere	2016
ARK16.260	Rhizosphere	Jonesboro	Test	112	Sabine	88.1746	Rhizosphere	2016
ARK16.258	Rhizosphere	Jonesboro	Test	112	CLXL745	103.246	Rhizosphere	2016
ARK16.256	Rhizosphere	Jonesboro	Test	112	Sabine	97.7653	Rhizosphere	2016
ARK16.254	Rhizosphere	Jonesboro	Test	112	CLXL745	95.2833	Rhizosphere	2016
ARK16.252	Rhizosphere	Jonesboro	Test	112	CLXL745	100.818	Rhizosphere	2016
ARK16.251	Rhizosphere	Jonesboro	Test	112	CLXL745	105.957	Rhizosphere	2016
ARK16.249	Rhizosphere	Jonesboro	Test	112	Sabine	103.824	Rhizosphere	2016
ARK16.224	Rhizosphere	Jonesboro	Test	14	CLXL745	17.7338	Rhizosphere	2016
ARK16.220	Rhizosphere	Jonesboro	Test	14	Sabine	29.4534	Rhizosphere	2016
ARK16.219	Rhizosphere	Jonesboro	Test	14	Sabine	27.0872	Rhizosphere	2016
ARK16.215	Rhizosphere	Jonesboro	Test	14	Sabine	36.6889	Rhizosphere	2016
ARK16.214	Rhizosphere	Jonesboro	Test	14	CLXL745	16.6724	Rhizosphere	2016
ARK16.213	Rhizosphere	Jonesboro	Test	14	CLXL745	33.0755	Rhizosphere	2016
ARK16.211	Rhizosphere	Jonesboro	Test	14	CLXL745	28.8517	Rhizosphere	2016
ARK16.209	Rhizosphere	Jonesboro	Test	14	Sabine	29.0782	Rhizosphere	2016
ARK16.174	Rhizosphere	Jonesboro	Test	84	Sabine	81.0957	Rhizosphere	2016
ARK16.172	Rhizosphere	Jonesboro	Test	84	Sabine	92.221	Rhizosphere	2016
ARK16.171	Rhizosphere	Jonesboro	Test	84	Sabine	86.5011	Rhizosphere	2016
ARK16.170	Rhizosphere	Jonesboro	Test	84	CLXL745	84.4863	Rhizosphere	2016
ARK16.168	Rhizosphere	Jonesboro	Test	84	Sabine	81.4956	Rhizosphere	2016
ARK16.164	Rhizosphere	Jonesboro	Test	84	CLXL745	85.2416	Rhizosphere	2016
ARK16.163	Rhizosphere	Jonesboro	Test	84	CLXL745	83.832	Rhizosphere	2016
ARK16.162	Rhizosphere	Jonesboro	Test	84	Sabine	84.5329	Rhizosphere	2016
ARK16.15	Rhizosphere	Jonesboro	Test	28	CLXL745	25.5626	Rhizosphere	2016
ARK16.136	Rhizosphere	Jonesboro	Test	70	CLXL745	70.8083	Rhizosphere	2016
ARK16.134	Rhizosphere	Jonesboro	Test	70	Sabine	77.1048	Rhizosphere	2016
ARK16.132	Rhizosphere	Jonesboro	Test	70	Sabine	74.2786	Rhizosphere	2016
ARK16.129	Rhizosphere	Jonesboro	Test	70	CLXL745	79.3179	Rhizosphere	2016
ARK16.128	Rhizosphere	Jonesboro	Test	70	Sabine	73.9139	Rhizosphere	2016
ARK16.127	Rhizosphere	Jonesboro	Test	70	Sabine	71.2201	Rhizosphere	2016
ARK16.126	Rhizosphere	Jonesboro	Test	70	CLXL745	72.6567	Rhizosphere	2016
ARK16.124	Rhizosphere	Jonesboro	Test	70	CLXL745	73.5189	Rhizosphere	2016
ARK16.11	Rhizosphere	Jonesboro	Test	28	Sabine	30.0064	Rhizosphere	2016
ARK16.10	Rhizosphere	Jonesboro	Test	28	CLXL745	36.484	Rhizosphere	2016
ARK16.1	Rhizosphere	Jonesboro	Test	28	Sabine	21.1853	Rhizosphere	2016
